# Supplementary material
Source: publisher figshare collection journal article supplement (https://acs.figshare.com/ndownloader/files/9969631)
Supplement: Supplementary file 1 [file 9969631]

## Supporting Information

# Preparation of Novel Fluorescent Nanocomposites Based on Au Nanoclusters and Their Application in Targeted Detection of Cancer Cells

*Xiaoyu Wang,<sup>#,†</sup> Junhan Xia,<sup>#,†</sup> Chun Wang,<sup>†</sup> Lu Liu,<sup>†</sup> Shuxian Zhu,<sup>†</sup> Wei Feng<sup>\*,‡,§</sup> and  
Lidong Li<sup>\*,†</sup>*

<sup>†</sup>State Key Laboratory for Advanced Metals and Materials, School of Materials Science and Engineering, University of Science and Technology Beijing, Beijing 100083, P. R. China.

<sup>‡</sup>School of Materials Science and Engineering, Tianjin University, Tianjin 300072, P. R. China.

<sup>§</sup>Collaborative Innovation Center of Chemical Science and Engineering (Tianjin), Tianjin 300072, P. R. China.

### Corresponding Author

\*E-mail: lidong@mater.ustb.edu.cn.

\*E-mail: weifeng@tju.edu.cn.

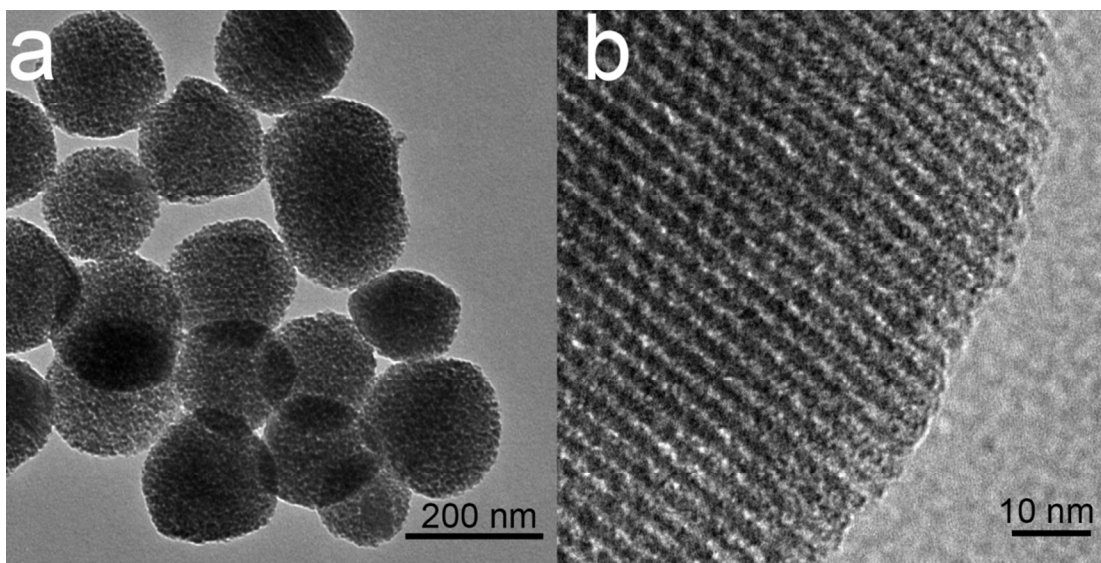

**Figure S1.** TEM images of mSiO<sub>2</sub> nanospheres (a) and their mesoporous structure as characterized by HRTEM (b).

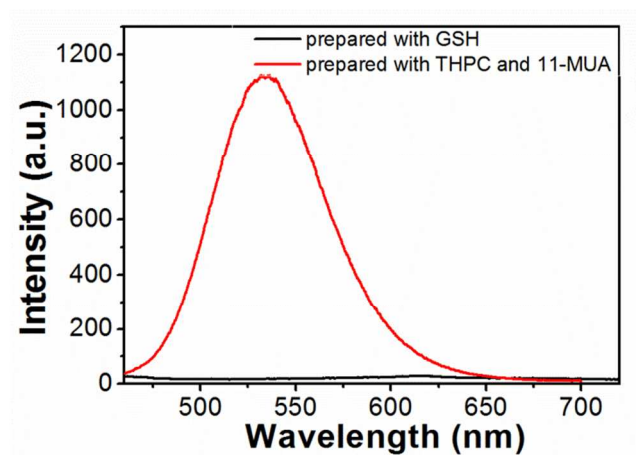

**Figure S2.** Fluorescence spectra of nanocomposites prepared with GSH under 420 nm excitation (black line), and with THPC and 11-MUA under 370 nm excitation (red line).

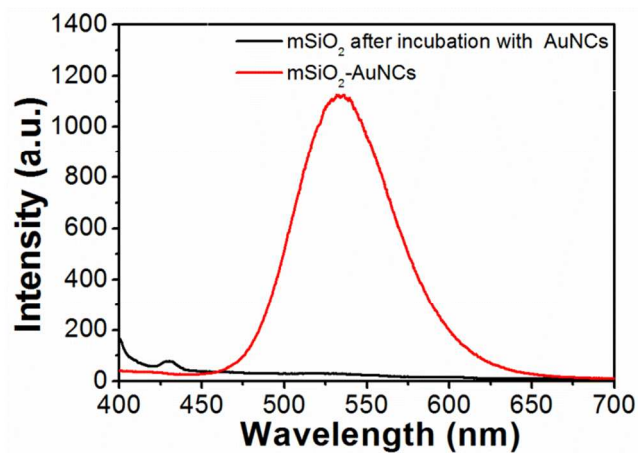

**Figure S3.** Fluorescence spectra of nanoparticles after incubation with free AuNCs (black line) and mSiO<sub>2</sub>-AuNCs (red line) for 48 h, respectively. The excitation wavelength was 370 nm.

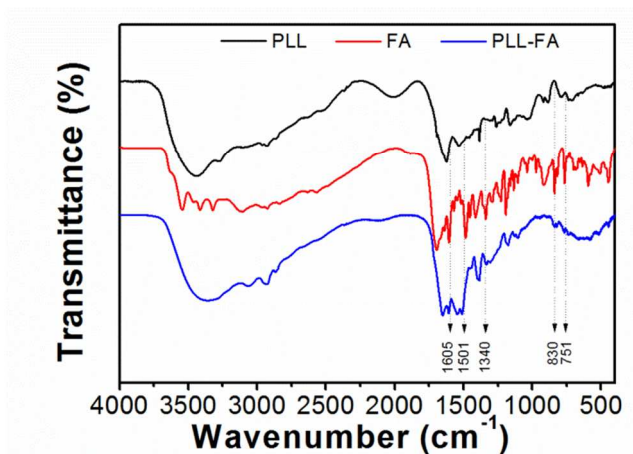

**Figure S4.** FT-IR spectra of PLL, FA and PLL-FA.

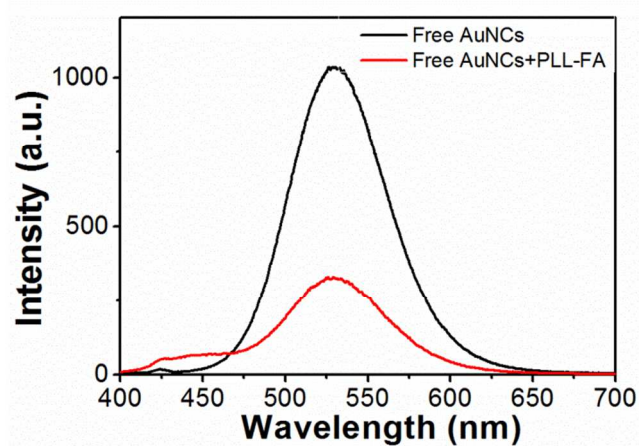

**Figure S5.** Fluorescence spectra of Free AuNCs before and after adding PLL-FA, respectively. The excitation wavelength was 370 nm.

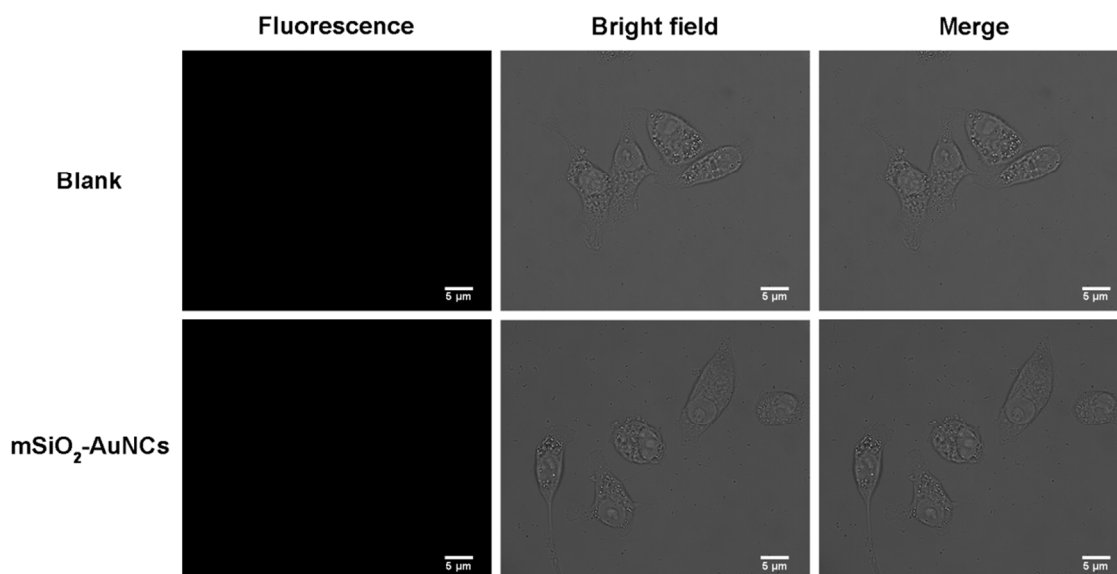

**Figure S6.** Fluorescence, bright field and overlay images of KB cells after incubation with mSiO<sub>2</sub>-AuNCs nanocomposites for 2 h. Scale bars: 5  $\mu$ m.
